# Supplementary material for: Trans-arterial chemoembolization as a loco-regional inducer of immunogenic cell death in hepatocellular carcinoma: implications for immunotherapy
Source: PubMed Central journal article supplement — J Immunother Cancer. 2021 Sep 30;9(9):e003311. doi: 10.1136/jitc-2021-003311 (PMC8487214; doi:10.1136/jitc-2021-003311), 2021-09-30

Immune modulating effects of TACE

**Trans-arterial chemoembolization as a loco-regional inducer of immunogenic cell death in hepatocellular carcinoma: implications for immunotherapy.**

David J. Pinato et al.

**Supplementary Results****Contents****TABLES**

|                                                                                                                                                                                   |               |
|-----------------------------------------------------------------------------------------------------------------------------------------------------------------------------------|---------------|
| <b>Supplementary Table 1</b>                                                                                                                                                      | <b>Page 3</b> |
| Patient disposition across participating institutions.                                                                                                                            |               |
| <b>Supplementary Table 2</b>                                                                                                                                                      | <b>Page 4</b> |
| The relationship between T-cell density across intra-tumoural (IT), peri-tumoural (PT) and non-tumoural background liver (NT) and prior treatment with TACE in patients with HCC. |               |
| <b>Supplementary Table 3.</b>                                                                                                                                                     | <b>Page 5</b> |
| Multivariable analysis of recurrence-free survival (RFS).                                                                                                                         |               |

## Immune modulating effects of TACE

**FIGURES****Supplementary Figure 1.****Page 6**

Distribution and phenotypic characteristics of T-cell infiltrate in intra-tumoural (IT), peri-tumoural (PT) and non-tumoural background liver tissue (NT) in patients with HCC (n=119).

**Supplementary Figure 2.****Page 7**

The relationship between intra-tumoral (IT) and non-tumoral (NT) T-cell density expressed in cells/mm<sup>2</sup> of tissue in T+ patients stratified on the basis of achievement of necrosis (N) in <50% (N-, n=37) or >50% (n=21) of the assayed tumoural tissue post-TACE.

**Supplementary Figure 3.****Page 8**

Heat map diagram of differential gene expression using Euclidean distance metrics in TACE-pretreated HCC patients (n=12, red colour) compared to TACE-untreated controls (n=12, blue colour).

**Supplementary Figure 4.****Page 9**

The expression of a panel of biomarkers of immune-tolerance in patients samples with (T+) or without (T-) prior TACE treatment.

*Immunotherapy Toxicity in HCC***Supplementary Table 1.** Patient disposition across participating institutions.

| <b>Participating Institution</b>                                             | <b>Patient samples (n, %)</b> |
|------------------------------------------------------------------------------|-------------------------------|
| Imperial College London, London, United Kingdom                              | 3 (2.5)                       |
| Istituto Nazionale Tumori, Milan, Italy                                      | 21 (17.6)                     |
| Hospital Clinic, Barcelona, Spain                                            | 18 (15.1)                     |
| Vall D'Hebron Hospital, Barcelona, Spain                                     | 5 (4.2)                       |
| San Martino University Hospital, Genova, Italy                               | 10 (8.4)                      |
| University of Udine, Hepatology and Liver Transplantation Unit, Udine, Italy | 62 (52.1)                     |
| <b>Total</b>                                                                 | <b>119 (100)</b>              |

## Immunotherapy Toxicity in HCC

**Supplementary Table 2.** The relationship between T-cell density across intra-tumoural (IT), peri-tumoural (PT) and non-tumoural background liver (NT) and prior treatment with TACE in patients with HCC.

|                                    | Multiplex IHC                       | TACE Group | Median cell density (cells/mm <sup>2</sup> ) | IQR               | p value       |
|------------------------------------|-------------------------------------|------------|----------------------------------------------|-------------------|---------------|
| <b>IT</b>                          | CD4 <sup>+</sup>                    | TACE-      | 151.1                                        | 166.3             | 0.62          |
|                                    |                                     | TACE+      | 40.8                                         | 191.8             |               |
|                                    | CD4 <sup>+</sup> FoxP3 <sup>+</sup> | TACE-      | 40.8                                         | 61.7              | <b>0.006*</b> |
|                                    |                                     | TACE+      | 8.2                                          | 32.7              |               |
|                                    | CD8 <sup>+</sup>                    | TACE-      | 118.4                                        | 129.9             | <b>0.002*</b> |
|                                    |                                     | TACE+      | 32.7                                         | 141.8             |               |
| CD8 <sup>+</sup> PD-1 <sup>+</sup> | TACE-                               | 36.7       | 34.7                                         | <b>&lt;0.001*</b> |               |
|                                    | TACE+                               | 16.3       | 40.8                                         |                   |               |
| <b>PT</b>                          | CD4 <sup>+</sup>                    | TACE-      | 608.6                                        | 656.8             | 0.41          |
|                                    |                                     | TACE+      | 600.0                                        | 580.1             |               |
|                                    | CD4 <sup>+</sup> FoxP3 <sup>+</sup> | TACE-      | 24.7                                         | 89.9              | 0.95          |
|                                    |                                     | TACE+      | 40.8                                         | 81.8              |               |
|                                    | CD8 <sup>+</sup>                    | TACE-      | 526.9                                        | 430.9             | 0.67          |
|                                    |                                     | TACE+      | 580.0                                        | 531.0             |               |
| CD8 <sup>+</sup> PD-1 <sup>+</sup> | TACE-                               | 98.0       | 83.7                                         | 0.85              |               |
|                                    | TACE+                               | 100.0      | 77.0                                         |                   |               |
| <b>NT</b>                          | CD4 <sup>+</sup>                    | TACE-      | 167.5                                        | 190.4             | 0.27          |
|                                    |                                     | TACE+      | 200.0                                        | 147.0             |               |
|                                    | CD4 <sup>+</sup> FoxP3 <sup>+</sup> | TACE-      | 8.2                                          | 24.5              | 0.74          |
|                                    |                                     | TACE+      | 1.0                                          | 32.7              |               |
|                                    | CD8 <sup>+</sup>                    | TACE-      | 251.7                                        | 200.0             | 0.12          |
|                                    |                                     | TACE+      | 253.2                                        | 188.0             |               |
| CD8 <sup>+</sup> PD-1 <sup>+</sup> | TACE-                               | 146.4      | 89.9                                         | <b>&lt;0.001*</b> |               |
|                                    | TACE+                               | 9.4        | 57.2                                         |                   |               |

## Immunotherapy Toxicity in HCC

**Supplementary Table 3.** Multivariable analysis of recurrence-free survival (RFS).

| Variable                                      | RFS<br>HR (95% CI) | P value       |
|-----------------------------------------------|--------------------|---------------|
| <b>IT CD4+FOXP3+</b><br><median/≥median       | 3.51 (1.14-10.81)  | <b>0.028*</b> |
| <b>TNM Stage</b><br>I/≥II                     | 1.05 (0.19-5.69)   | 0.952         |
| <b>Child-Turcotte<br/>Pugh class</b><br>A/B-C | 1.76 (0.33-9.56)   | 0.504         |
| <b>AFP</b><br><median/≥median                 | 1.10 (0.35-3.40)   | 0.869         |

## Immunotherapy Toxicity in HCC

**Supplementary Figure 1.** Distribution and phenotypic characteristics of T-cell infiltrate in intra-tumoural (IT), peri-tumoural (PT) and non-tumoural background liver tissue (NT) in patients with HCC (n=119).

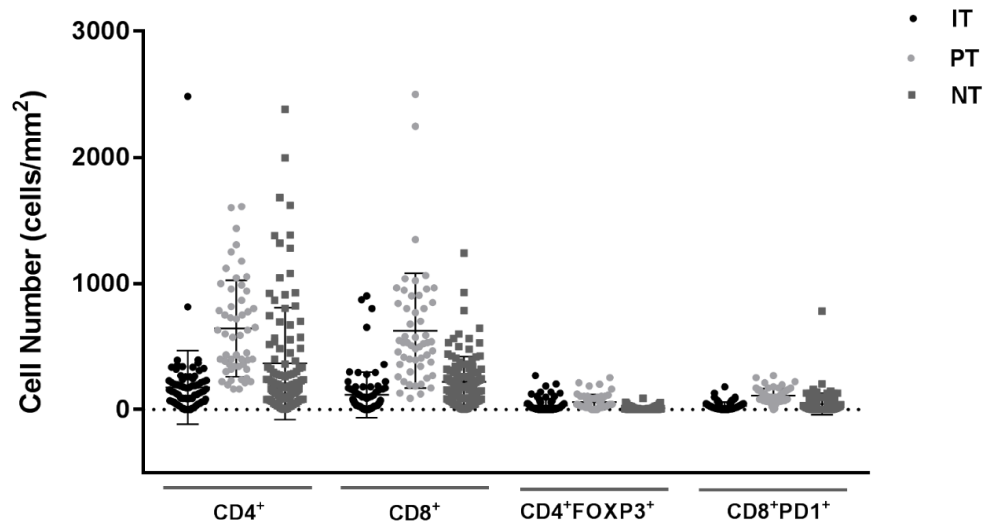

## Immunotherapy Toxicity in HCC

**Supplementary Figure 2.** The relationship between intra-tumoral (IT) and non-tumoral (NT) T-cell density expressed in cells/mm<sup>2</sup> of tissue in T+ patients stratified on the basis of achievement of necrosis (N) in <50% (N-, n=37) or ≥50% (n=21) of the assayed tumoural tissue post-TACE.

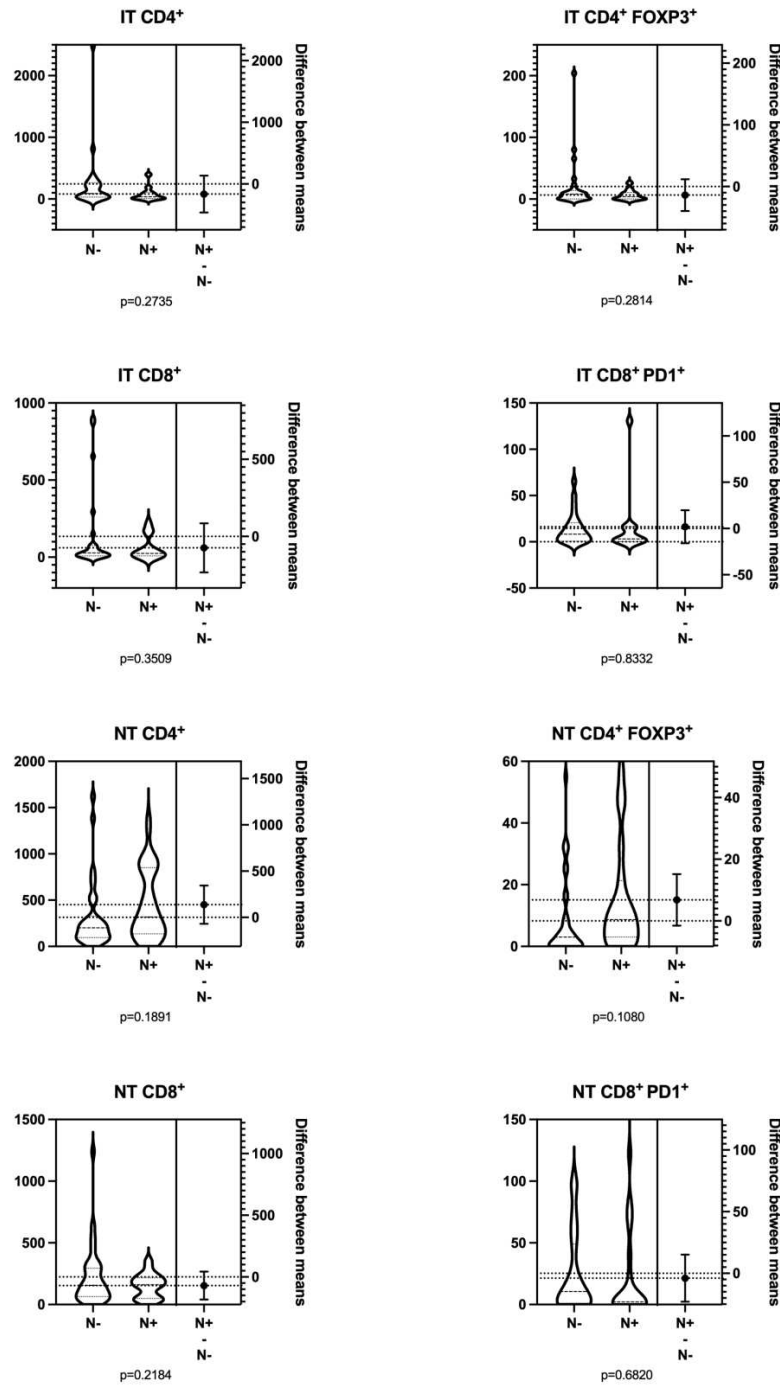

*Immunotherapy Toxicity in HCC*

**Supplementary Figure 3.** Heat map diagram of differential gene expression using Euclidean distance metrics in TACE-pretreated HCC patients (n=12, red colour) compared to TACE-untreated controls (n=12, blue colour).

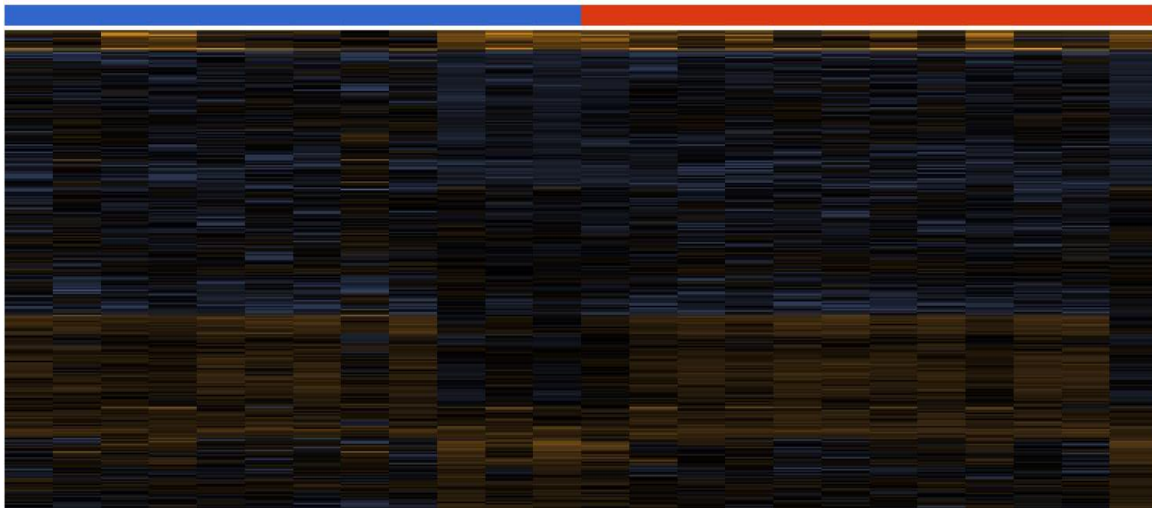



## Immunotherapy Toxicity in HCC

**Supplementary Figure 4.** The expression of a panel of biomarkers of immune-tolerance in patients samples with (T+) or without (T-) prior TACE treatment.

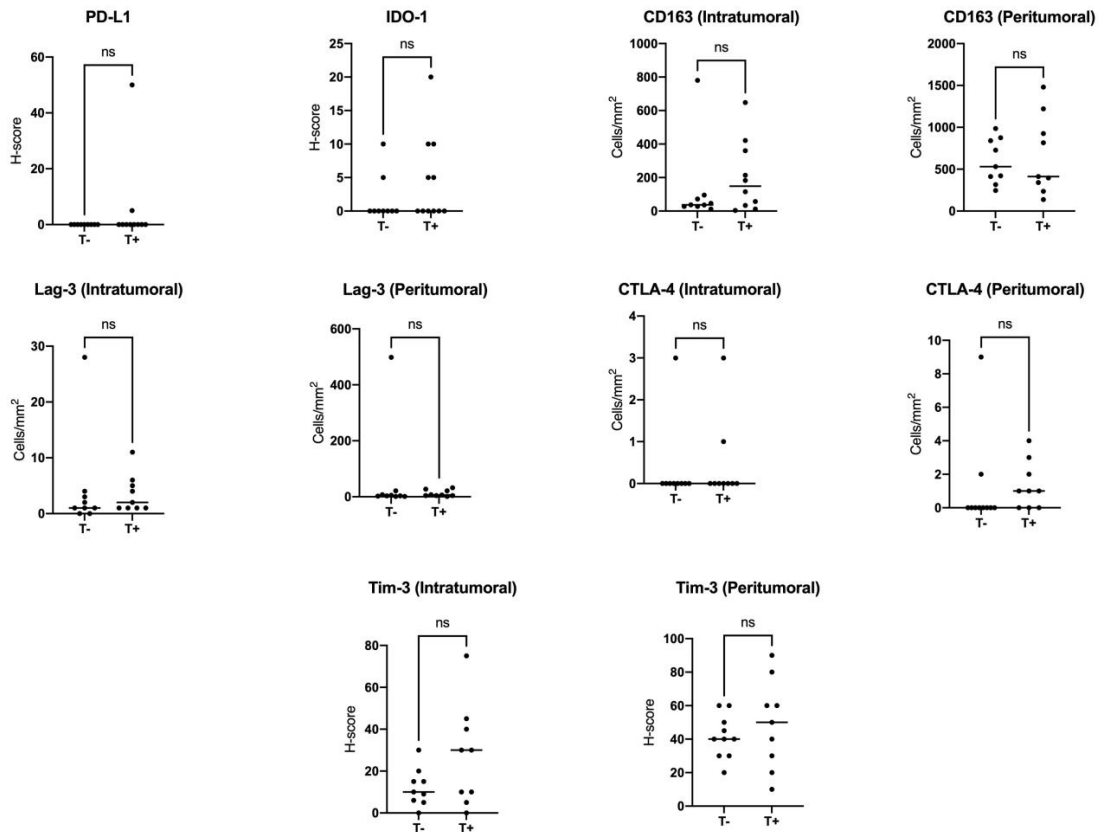

Supplement: jitc-2021-003311supp001.pdf [file jitc-2021-003311supp001.pdf]
